# Supplementary material
Source: publisher figshare collection journal article supplement (https://tandf.figshare.com/ndownloader/files/14133263)

# Supplementary information

## **miR-151-5p Modulates AHP1a Expression to Participate in Contextual Fear Memory Formation**

**Xu-Feng Xu<sup>1,2,4</sup>, You-Cui Wang<sup>1</sup>, Liang Zong<sup>5</sup>, Xiao-Long Wang<sup>3</sup>**

<sup>1</sup>Institute of Brain Science and Disease, School of Basic Medicine, Qingdao University, Qingdao, Shandong 266001, People's Republic of China, and <sup>2</sup>University of Ottawa Institute of Mental Health Research at The Royal, Department of Psychiatry, and Department of Cellular and Molecular Medicine, Ottawa K1Z 7K4, Canada, and <sup>3</sup>Department of Breast Surgery, Qilu hospital, Shandong University, Jinan, Shandong 250012, People's Republic of China, and <sup>4</sup>Department of Cell and Neurobiology, School of Basic Medicine, Shandong University, Jinan, Shandong 250012, People's Republic of China, and <sup>5</sup>BGI-Shenzhen, Shenzhen 518083, People's Republic of China.

## Supplementary Figure 1:

The freezing response during the training process. These mice were sacrificed at different times after training (n=5-6).

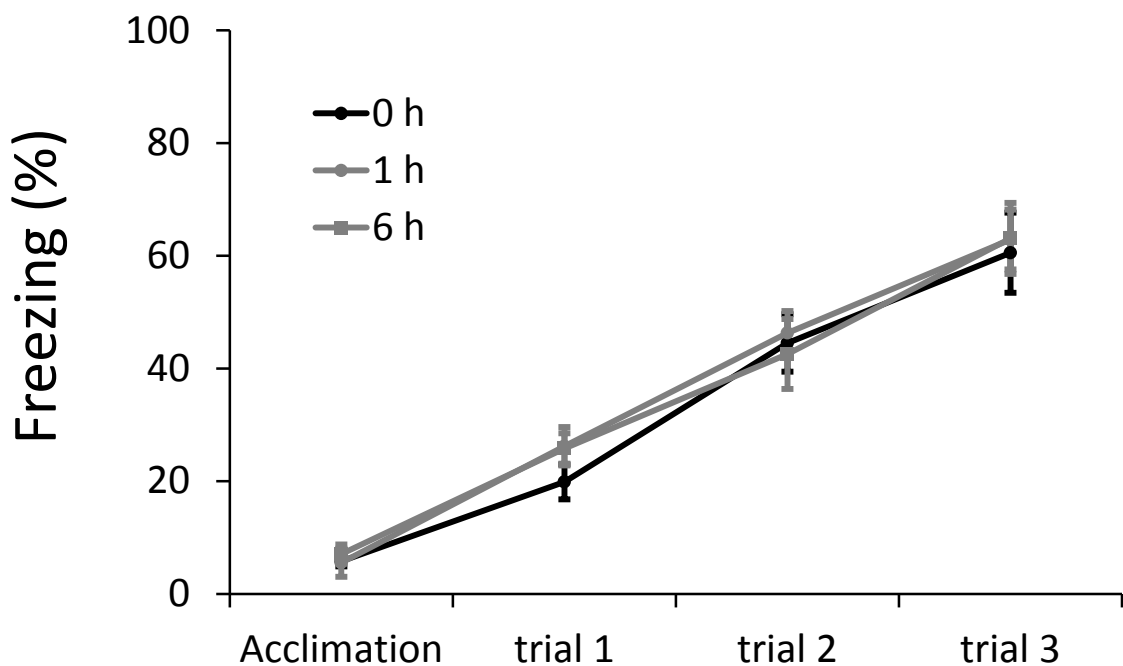

Supplement: Supplementary file 1 [file 14133263]
